# Supplementary material for: First finding of free-living representatives of Prokinetoplastina and their nuclear and mitochondrial genomes
Source: PubMed Central journal article supplement (PMC7859406; doi:10.1038/s41598-021-82369-z), 2021-02-03
Supplement: 41598_2021_82369_MOESM1_ESM.pdf [file 41598_2021_82369_MOESM1_ESM.pdf]

**Supplementary Information**

**First finding of free-living representatives of Prokinetoplastina and their nuclear and mitochondrial genomes**

Denis V. Tikhonenkov<sup>1,2,\*,#</sup>, Ryan M. R. Gawryluk<sup>3,#</sup>, Alexander P. Mylnikov<sup>1,†</sup>, Patrick J. Keeling<sup>4</sup>

<sup>1</sup> Papanin Institute for Biology of Inland Waters, Russian Academy of Sciences, Borok, 152742, Russia

<sup>2</sup> AquaBioSafe laboratory, University of Tyumen, 625003, Tyumen, Russia

<sup>3</sup> Department of Biology, University of Victoria, Victoria, V8W 2Y2, British Columbia, Canada.

<sup>4</sup> Department of Botany, University of British Columbia, Vancouver, V6T 1Z4, British Columbia, Canada

† Deceased May 30, 2019

\* Correspondence: tikho-denis@yandex.ru

# equal contribution

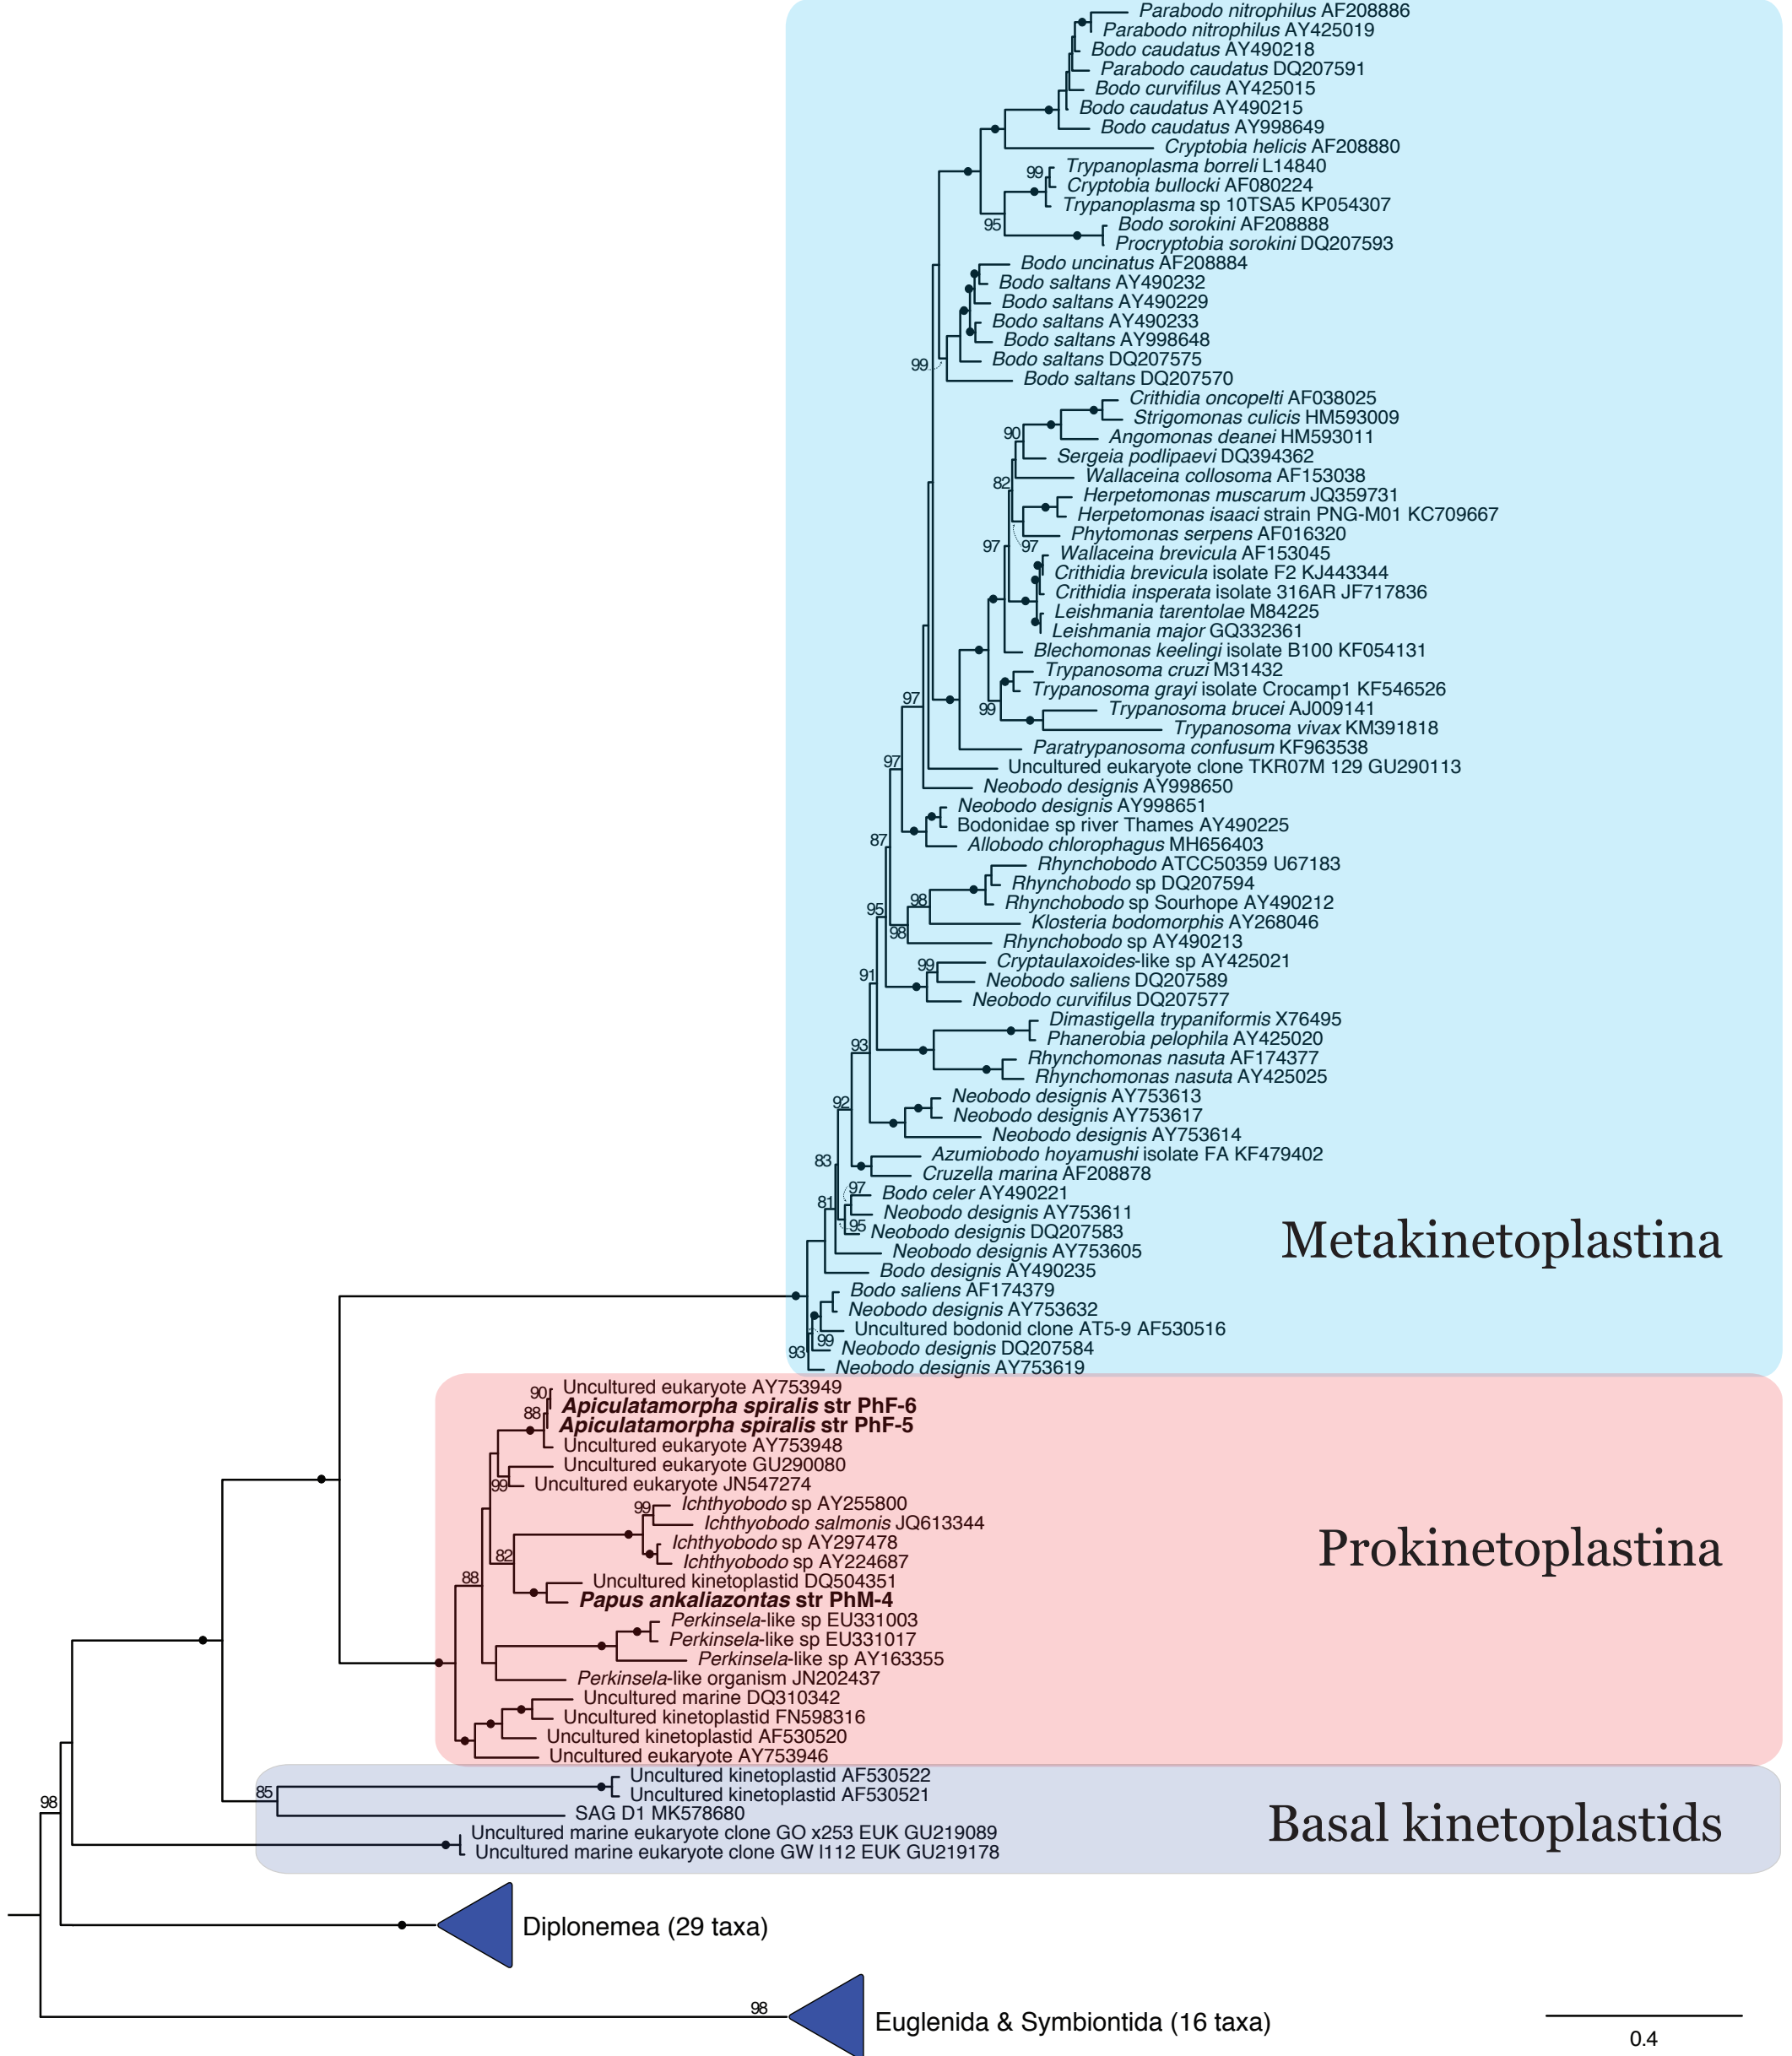

**Supplemental Figure S1.** A maximum likelihood phylogeny of the 18S ribosomal RNA gene from diverse kinetoplastids, diplomonids, and euglenozoans (outgroup). Reconstructed with IQ-TREE v1.6.12 using the GTR+F+I+G4 model with 200 initial parsimony trees and 1000 ultrafast bootstrap replicates as a measure of support.

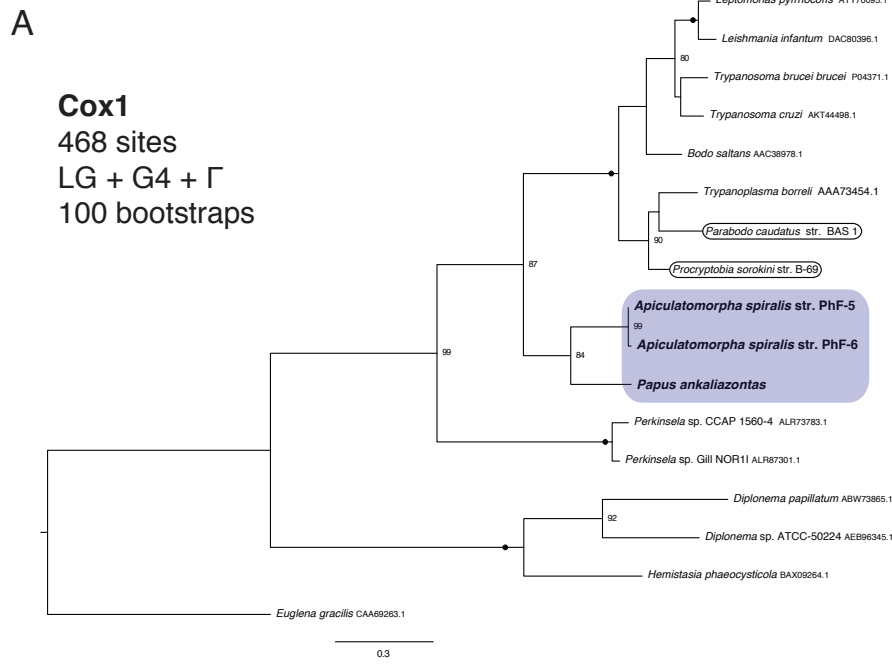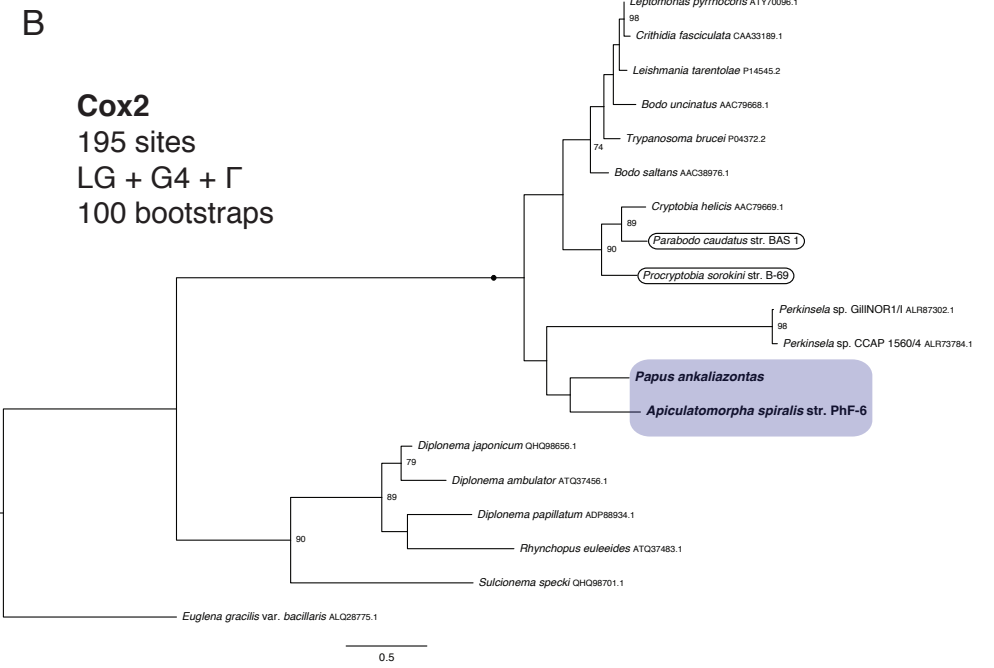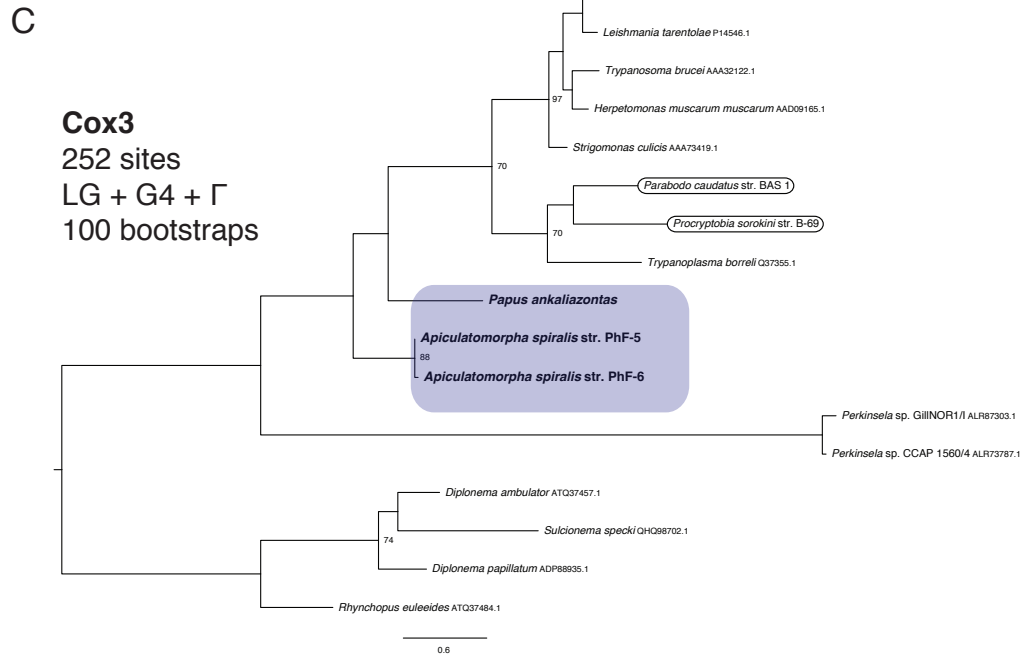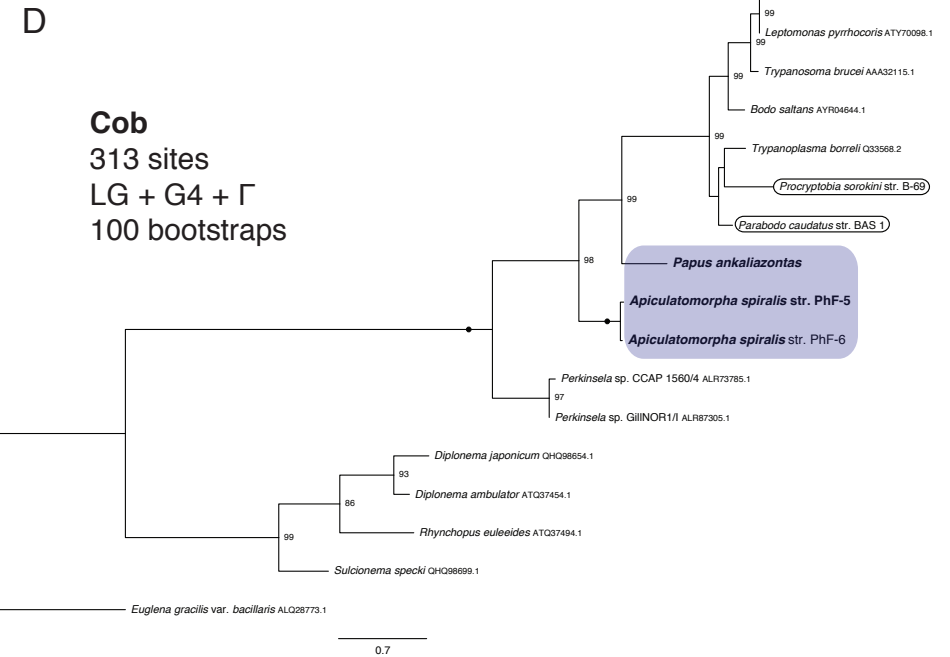

**Supplementary Figure S2.** Maximum likelihood phylogenies of mtDNA-encoded proteins demonstrate that they do not derive from prey bodonids. Phylogenies of (a) cytochrome c oxidase subunits I (Cox1), (b) II (Cox2), (c) III (Cox3), and (d) cytochrome b (Cob) are shown. The prokinetoplastids *P. ankaliazontas* and *A. spiralis* are indicated by bolded text inside of a coloured box; the names of their prey are enclosed in boxes. Non-parametric bootstrap values are shown as measures of statistical support; for clarity, values less than 70 are not shown and values of 100 are represented by black circles.

A

cob mRNA GCCGCTGTATGTTTCT**TTTGT**TTA**TTTTTTT**A**TTTTTTT**GTTTCG**TTT**GCG**TTT**GT**TTT**G**TTTTTTT**A**TTTTG**TTT**TTT**AGA-A-AT**GT**AG**TTG**-CG**ATT**  
cob DNA GCCGCTGTATGTTTCT---G---A-----A-----G---CG---GCG---GT--G-----A---G---AGATATAT-G-A-TG**GC**GA--

cob mRNA **TTGTT**GT-C**TTG**TG**ATT**GACTCG**TTT**G**TTT**AG**TTT**AGG**TTT**A-G**TTT**GGCA**TTT**ACT-ATGGG**TAT**GC--AG**TTATT**AGTAGGAG**TAA**G**TTT**G**TTT**G  
cob DNA --G--GT**C**--G-GA--GACTCG--G--AG--AGGA--AT**G**--GGCA--ACT**TA**-GGG-A-G**CT**TAG--A--AG-AGGAG-AAG---G-C--G

cob mRNA GAT**GTATT**G**TAA**T**GTTTTTTTTTTT**C**TTGG**TTAG**TGTTTT**ATG**TATGG**TAGAT**TTTT**GA-AGGA--GG**TTATAT**G**TTT**GCG**TTCT**TTGCAT**ATTG**TT**TT**G  
cob DNA GA-G-A--G-AA-G-----C--GG---AG-G----A-G-ATGG-AGA----GATAGGAT**TT**GG--A-A-G--GCG--CT--GCA-A--GT---G

cob mRNA ACA--AG**TTGT****TTG**T**TTTTTT**G**TTG**ATTGACAT**ATTG**TAA**TG**T**TTTTTT**G**TTTTT**GA**TG**TTT**G**-AT**CT**GC**ATT**G**TATG**TT**GATT**GG**TAG**TT**TT**  
cob DNA AC**ATT**AG--GT--G-A-----G--G-A--GACA-AT--G-AAA-G-A-----G-----GA-GTT**GT**TAT-C-GCA--G-A-G---GA--GG-AGG--

cob mRNA **TTGTTTT**G**TTTTT**G**TTT**G**TTTTT**G--ATAGCT**TTT**ATAGG**ATA**G**TTTT**GCC**ATT**GACCCAGATG**TCAT****TT**GAGGGCTTACTG**TG**TT**TT**AG**TAA**TATA  
cob DNA --GT---G-A---GG---GA----G**TTA**-AGCTTT-A-AGGA-A-G---GCCA--GACCCAGATG-CA-A--GAGGGCTTACTG-G---AG-AA-A-A

cob mRNA **TTTT**GCT---AC**TTT**G-CC**CTGG**TTGGG**TTT**GAG**TTGG**TTT**ATT**--GGATTGAGG**TT**CAGAG**TTT**ATTCAGGAAGG**TA**-**CTT**GG**TAA**AGATACATT**CC**  
cob DNA ---GCT**TTT**AC---G**CCCC**-GG--GGG**TT**-GAG**T**--GG--ATT**TT**GGATT**T**GAGG--CAGAG--ATTCAGGAAGG-**ATC**---GG-AAAGA-ACATT**CC**

cob mRNA **CTT**CATTT-G**TTG**TTGCC**ATT**GGG**TTT**G**TT**ATTT**TT**G**ATT**G**ATT**GCA**TTTTTTT**G**TTT**GCA**TTA****TTTTTT**GAG**TTCT**G**ATT**TT**GTT**-AGAT**CTG****TTTT**GT  
cob DNA C--C**ATTTT**G--G--GCCA--GGG--G--ATTT**T**-GA--G-A--GCA-----G--GCA--A-----GAG--C-GA--GTT**T**AGA-CG----GT

cob mRNA **GTTTT**ATTTGGAGC--**GTTG****TTTTTT**G**TTT**AT**TG**TT**TTTT**A-GA--G**TTT**G**TTTTT**G**TTG**AT**TTT**G**TTTTT**G**ATTT**G**ATTTT**ATTT**TT**GT  
cob DNA G----A---GGAG**CTT**G--G-----G---A--GA----A---ATG**ATT**TGA---G-----G--GA---G-----G-A---G-A-----A---GT

cob mRNA **TTT**ATTT**TT**GG**TATTTT**G**TTTTT**CA**TGA**GAAT**CTGG**TT**AA**T**AGTT**G**ATG**T**GA**T**GA**AGACAT**CTG**AGAAGG**TTAT**CCAG**A**---A**TGG****TTTTTTT**G  
cob DNA TT--A---A--GG-A---G-----CA-GAAG**ATC**--GG--AA-AG--GA-G-GA-GAAGACAT**CTG**AGAAGG--A--CCAG**ATTTA**-GG-----G

cob mRNA AT**GTTTTT**GG**TG**T**GATTA**---AA**TCAAT**CTCG**ATAA**-**GTTTTT**G---G**TGTTTT**ATTT**TT**G**TGT**---**GTTTTT**GG**TTTTT**AT**GG**TT**TT**G**TTG**  
cob DNA ATG-----GG-G-GA--**ATTTT**AA-CAAT-CCTGA-**AATG**-----G**TTTT**G-G---A-----G-G**TTTT**G-----GG-----A-GG---G--G-

cob mRNA **TGTT**G**TTTTT**G**TTT**AT**TCAT**TT**TT**G**ATTT**GCG**TTT**G-C**ATTTT**TG**TG**TT**TT**TT**TT**G**TTTTT**G**TTAG****TTTTTT**G**TATG**T**GT**TT**G**-GG**TTT**G  
cob DNA -G--G-----G--A--CA--G--G-A--GCG--G**TC**A-----G-GT**GT**TTT---GT---G--AG-----G-A-GT**G**--G--G**TTG**---G

cob mRNA **TTG**CT**GTTT**A**TGTTTT**G**TTATTT**CC**TG**T**ATGG**TT**AG**TT**GC**TT**ACT****TTG****TTTT**G**TTT**G**TTGA**T**GAT****TTT**GG**TG**A**CT****TTTT**G**TTA**AT**TTA**  
cob DNA --G-C-G---A-G---G--A--A---CC-G-A-GG--A-GG--GCAG**TTAC**--G---G---G-G**TTGA**-GAT---GG-GA-ACG---G---AA---A

cob mRNA **TTTTT**GTT**TTTT**G**TTTTTTT**A**TTTTTTT**TT**TTT**GGTTGTT**GGTA**  
cob DNA -----GTT---G-----A-----GGTTGTT**GGTA**

B

Cob mRNA TTTTA**TTA**TT**TAA**TT**GTTT**CG-TA**TT**CG**TTTTTT**G**TTTTTTT**G**TTTTTTT**A-GA-AA**TTT**GA--G**TTG**CT**TTA****TTTT**GGC**TT**GA-GA-TTTGA-C**T**  
Cob DNA TTTTA-TTA-TTAA--G---CG**TTA**--CG-----GG-----G---G---AT**G**ATAA--TG**ATT**G-GG-C--A---GGC--GAT**GAT**TT**TGAT**C-

Cob mRNA AGA-A**TTTT**AG**TTT**G---GG**TTTT**AA**TT**GGC**TTT**TG-----G--G**ATT**G**TT**ATGCAG----ATTT**TT**-G-TTGGTATGGTGGTAGCTTGAATGTACA  
Cob DNA AGA**TA**-----AG---G**TTT**GG---AA-TTGGC--TT**GTTTTT**G**TTGA**-TG--ATGCAG**TTTT**ATTT**TT**T**TT**G**TT**GGTATGGTGGTAGCTTGAATGTACA

Cob mRNA ATAATATGTTTTTTTCTCTTTTGTAAAGTGT**TAT**TGTTGATGTCTTGATTATGAATTTGGATGGCTTGTTCGTTGTTTTCATATAGTATTGACTAGTGT  
Cob DNA ATAATATGTTTTTTTCTCTTTTGTAAAGTGT**TAT**TGTTGATGTCTTGATTATGAATTTGGATGGCTTGTTCGTTGTTTTCATATAGTATTGACTAGTGT

Cob mRNA TATATATCTTTTATTTTGGCCATATTTGTAAAGT**TTTT**TATGTTTGT**TAA**TGTTT**GAT**AGTATTGCTATGGTTGATTTTCCGATTTATAGTTTTT  
Cob DNA TATATATCTTTTATTTTGGCCATATTTGTAAAGT**TTTT**TATGTTTGT**TAA**TGTTT**GAT**AGTATTGCTATGGTTGATTTTCCGATTTATAGTTTTT

Cob mRNA ATTTT**TTA**AT**TGG**TAT**GCT**TTTAT**TGG**TTATGTTT**AC**CTCTTACTCAGATGTCATATTGAGGACTAACTGTTTTTAGTAATATTTTAGCTACTGTAC  
Cob DNA ATTTT**TTA**AT**TGG**TAT**GCT**TTTAT**TGG**TTATGTTT**AC**CTCTTACTCAGATGTCATATTGAGGACTAACTGTTTTTAGTAATATTTTAGCTACTGTAC

Cob mRNA CTTTAGTGGGAGAA**TTTT**AGTTTTTTGATTTTGGGGTAGTGAATTTATTAGTGAAGTTACTTTAGTTAAGGTGCATTTATTACATATAGCTTTACCGTG  
Cob DNA CTTTAGTGGGAGAA**TTTT**AGTTTTTTGATTTTGGGGTAGTGAATTTATTAGTGAAGTTACTTTAGTTAAGGTGCATTTATTACATATAGCTTTACCGTG

Cob mRNA GATAGCTTCGTTTTTTGTTTTAGCACATATGTTTTTTTACATTATTATTTGAGTTCCGATGCTATAGATCGGTATGTTTTTTATTTAGAAAGGTGTTTT  
Cob DNA GATAGCTTCGTTTTTTGTTTTAGCACATATGTTTTTTTACATTATTATTTGAGTTCCGATGCTATAGATCGGTATGTTTTTTATTTAGAAAGGTGTTTT

Cob mRNA TTTGTTTAT**TGG**TTTTATTTTCGTGATTTAGTTT**TG**TTTTG**TAT**TTTTTTGTTTTTTCTTTGGGTATTTTGTTTTTTTGTTGGTGATTTTTGTTTTTCATG  
Cob DNA TTTGTTTAT**TGG**TTTTATTTTCGTGATTTAGTTT**TG**TTTTG**TAT**TTTTTTGTTTTTTCTTTGGGTATTTTGTTTTTTTGTTGGTGATTTTTGTTTTTCATG

Cob mRNA AAGAATCTGGGTATTGTGAATGTTATGAAGACTTCTGAAAAAGTTATACCTGAGGAGTTT**GAT**TTGGTGATAAGTCAATCTCCGAAAGGGGGGGAA  
Cob DNA AAGAATCTGGGTATTGTGAATGTTATGAAGACTTCTGAAAAAGTTATACCTGAGGAGTTT**GAT**TTGGTGATAAGTCAATCTCCGAAAGGGGGGGAA

Cob mRNA TG**GT**GAT**TTGG**TTTTT**GAC**GT**TGT**GGTTT**GTC**GATTTT**AG**GT**GG**TTT**GAG**TAGAGAGAAGCGGGAGTGT**TCC**GGGGGAGCATT**GTT**GAAATTT**G**TAA  
Cob DNA TG**GT**GAT**TTGG**TTTTT**GAC**GT**TGT**GGTTT**GTC**GATTTT**AG**GT**GG**TTT**GAG**TAGAGAGAAGCGGGAGTGT**TCC**GGGGGAGCATT**GTT**GAAATTT**G**TAA

Cob mRNA GGGGTTTTT**GAC**GAAGTAGGTTTTT**GTT**GAGAGGTGTT**AA**TTTTTTATTTT**GTT**TAAGGTAGATTT**GAC**TTT**GTT**AGTTGGTTT**GTT**ATTTGGGGGA  
Cob DNA GGGGTTTTT**GAC**GAAGTAGGTTTTT**GTT**GAGAGGTGTT**AA**TTTTTTATTTT**GTT**TAAGGTAGATTT**GAC**TTT**GTT**AGTTGGTTT**GTT**ATTTGGGGGA

Cob mRNA TGGAT**TGT**AGGTTTT**GTT**GGGGTGGGATT**GTT**AAGT**GT**GGT**GAT**GTGTTTT**AG**GATTT**TG**GGGTTACGGTTT**GAT**TTTT**TG**GGTTT**GTT**ATTTAAAT  
Cob DNA TGGAT**TGT**AGGTTTT**GTT**GGGGTGGGATT**GTT**AAGT**GT**GGT**GAT**GTGTTTT**AG**GATTT**TG**GGGTTACGGTTT**GAT**TTTT**TG**GGTTT**GTT**ATTTAAAT

Cob mRNA TGGGCTTGGGTTGAAATTTTATGGACGGATGCTTTTGGGGTTAGAAATGGTTT**GAG**TTGGGAATGTTTGGTTT**GAT**TGAAATTT**GAG****TTT**G**TC****TTT**GGC  
Cob DNA TGGGCTTGGGTTGAAATTTTATGGACGGATGCTTTTGGGGTTAGAAATGGTTT**GAG**TTGGGAATGTTTGGTTT**GAT**TGAAATTT**GAG**---G**TCG**---GGC

Cob mRNA **TG**ATTGAG---G**TTTTTT**GGTTTT**CC****TTT**GAA**TAA**GG**TTTTT**G**TTT**G**TTT**G-G**ATT**GTTTGG-GTT**TG**AT**AT**GAT**TTTT**G**TAT**GG**TG**-A**ATT**GTT  
Cob DNA -GATTGAG**TTT**G-----GGTTT-CC---GAA-AAGG-----GT---G---G**TG**-A--GTTTGG**TG**TT-GA-A-GAT---G-A-GGG-G**TA**-A--GTT

Cob mRNA TGAGGTT**TTTTTT**G**TTT**G-G---A**TA**TGTT-G**TTA**TGATT**AA**T**AG**GT**TTTT**CG**TTT**G**CTTTTT**G**TTA**AT**TT**GGG-GA**TA**AT**TTTT**GTTTAT**TAA**  
Cob DNA TGAGGTT-----G---G**TG****TTTTA**-A-GTT**TG**--A-GATT**AA**-A-GGT-----CG---G-C-----G--AAT--GGG**TGA**-AATT---GTTTTAT**TAA**

Cob mRNA TGTT**TT**ATAAAAAAAAA---AAA  
Cob DNA TGTT--ATAAAAAAAAA**TTT**AAA

**Supplementary Figure S3.** Representative U indel editing in *Papus ankaliazontas* and *Apiculatamorpha spiralis*. Nucleotide alignments of the cytochrome b gene and edited mRNA sequences are presented for (a) *P. ankaliazontas* and (b) *A. spiralis*. Editing of Cob illustrates the broadscale patterns of RNA-editing observed in these two new species: *P. ankaliazontas* mitochondrial mRNA transcripts are extensively edited along their entire length, whereas *A. spiralis* counterparts were typically edited at their termini. Bold red nucleotides denote U insertions and blue nucleotides denote U deletions (although represented by T). Cob is the 6th most heavily edited mRNA in each of *P. ankaliazontas* and *A. spiralis*.

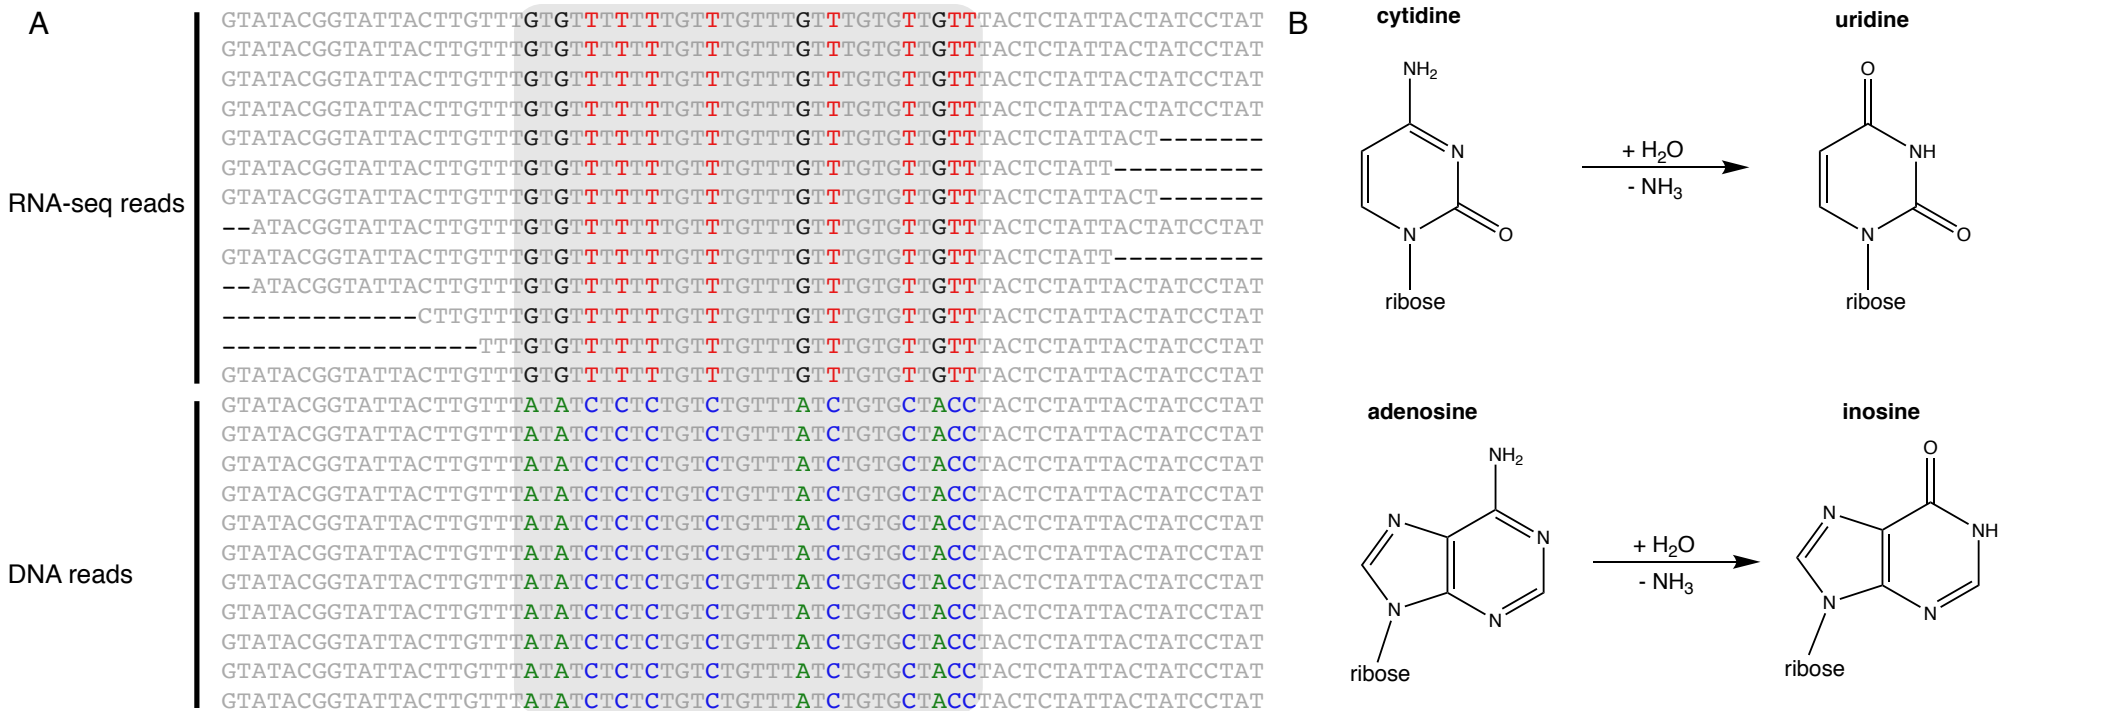

**Supplementary Figure S4.** Evidence for C-to-U and A-to-I RNA-editing in the putative *Papua ankaliazontas* mitochondrial 12S rRNA. (a) Multiple alignment of RNA-seq and genomic DNA reads from *P. ankaliazontas*. Deaminative editing of cytosine to uracil and adenosine to inosine is observed as C-to-T and A-to-G changes, respectively. A cluster of 12 deamination edits were observed over a short span of the 12S rRNA, representing the first description of deaminative editing in kinetoplastids; no incompletely edited sites were observed. (b) Chemical reactions underlying C-to-U and A-to-I RNA-editing.

## RECC20

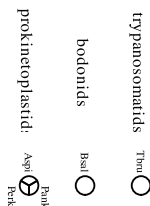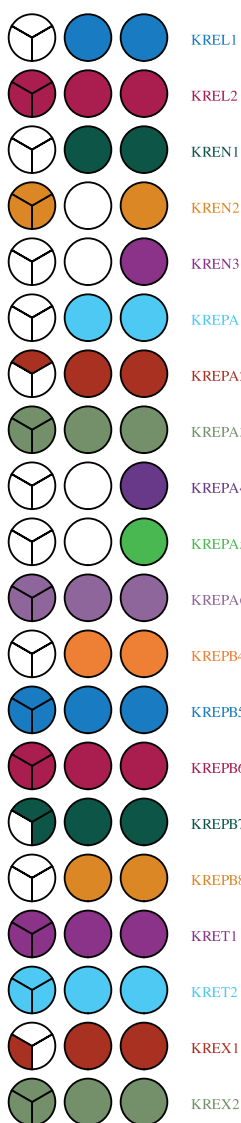

## MRB1

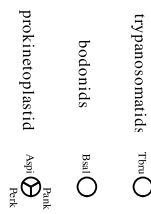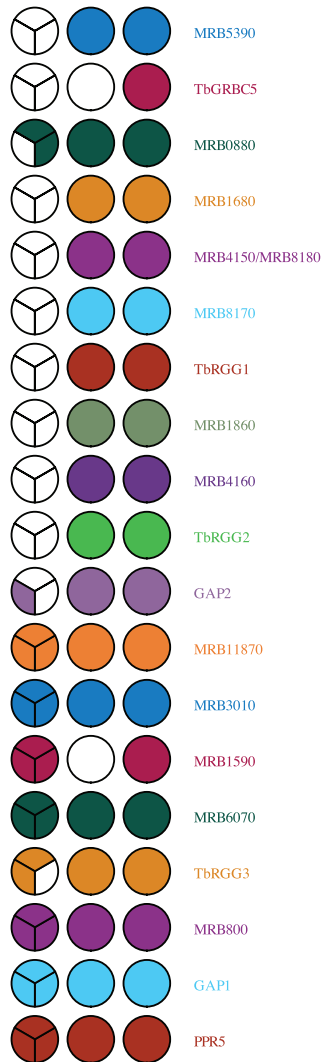

## Others

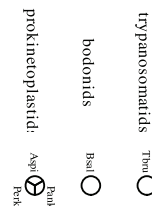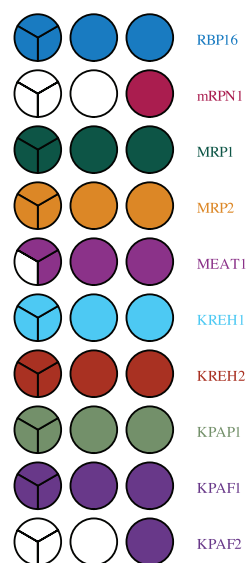

**Supplementary Figure S5.** RNA-editing machinery in prokinetoplastids. Coulsen plot highlighting the presence and absence of *Trypanosoma brucei* RNA-editing components in *Bodo saltans*, and the prokinetoplastids, *Perkinsela*, *Papus ankaliazontas*, and *Ankaliazontas spiralis* PhF-6. To accommodate all genes, the plot shows components from the RECC20 and MRB1 and ‘others’ separately. Filled in wedges indicate the presence of a subunit, and empty wedges indicate absence.

**Supplemental Table S1.** Statistics for *Papus ankaliazontas* and *Apiculatomorpha spiralis* genome assemblies. Genomes were assembled for each species with SPAdes, and decontaminated of prey kinetoplastids and co-cultured bacteria using a combination of Automet (for prokaryotes), and blastn using transcriptome assemblies from cultures that contained the eukaryotic prey. Most statistics are derived from Quast analysis; however, transcript mapping rate and number of introns are derived from BLAT analyses, paired read mapping rate – referring to the percentage of genomic DNA reads that map to the decontaminated genome assemblies – were derived using bbmap, and transcript number refers to number of transcriptome coding sequences predicted by Transdecoder. Predicted genome size corresponds to Bayesian kmer-based estimates generated by GCE. Intergenic distances are based on manually inspected gene mapping on several of the longest contigs.

|                              | <i>P. ankaliazontas</i> | <i>A. spiralis</i> |
|------------------------------|-------------------------|--------------------|
| Contigs                      | 5,118                   | 9,927              |
| N50 (bp)                     | 5,464                   | 2,438              |
| Assembly length (bp)         | 22,454,015              | 24,339,364         |
| Longest contig (bp)          | 31,864                  | 25,801             |
| GC (%)                       | 55.8                    | 48.02              |
| Coverage (SPAdes)            | 6                       | 2                  |
| N's per 100 kb               | 86.59                   | 0.82               |
| Transcript number            | 21,181                  | 32,854             |
| Transcript mapping rate (%)  | 73                      | 37                 |
| Number of introns            | 0                       | 0                  |
| Intergenic distance (bp)     | ~78                     | ~1200              |
| Paired read mapping rate (%) | 44                      | 6.5                |

**Supplemental Table S2.** Table of RNA editing statistics for *Papus ankaliazontas* and *Apiculatomorpha spiralis* strain PhF-6, based on comparisons between edited mitochondrial mRNAs identified in transcriptome datasets and genomic contigs.

| Species                 | Gene         | mRNA completeness | Gene completeness | Editing Type                                            | Pre-edited length | Edited ORF Length | % Size increase | Insertions | Deletions | Observations                                                                                                                                                                                                                      |
|-------------------------|--------------|-------------------|-------------------|---------------------------------------------------------|-------------------|-------------------|-----------------|------------|-----------|-----------------------------------------------------------------------------------------------------------------------------------------------------------------------------------------------------------------------------------|
| <i>P. ankaliazontas</i> | Nad1         | complete          | Uncertain 5'      | Pervasive central and 3' editing, diminished at 5' end. | 394               | 684               | 73,60406091     | 329        | 39        | Stop codon formed by 3 U deletion.                                                                                                                                                                                                |
| <i>P. ankaliazontas</i> | Nad4         | incomplete        | internal problems | Pervasive central and 5' editing, diminished at 3' end. | 711               | 1028              | 44,58509142     | 349        | 32        | Cannot assemble a full-length mRNA lacking internal stop codons. Dominant version has stop codons, but is highly supported by the reads. Possible pseudogene? Stop codons exist in a high GC area, suggestive of loss of editing. |
| <i>P. ankaliazontas</i> | Nad5         | complete          | complete          | pan                                                     | 805               | 1517              | 88,44720497     | 885        | 49        | Stop codon generated by U insertion. Required some manual curation.                                                                                                                                                               |
| <i>P. ankaliazontas</i> | Nad7         | complete          | complete          | pan                                                     | 723               | 1218              | 68,46473029     | 542        | 47        | Stop codon generated by U insertion.                                                                                                                                                                                              |
| <i>P. ankaliazontas</i> | Nad8         | complete          | complete          | pan                                                     | 274               | 456               | 66,42335766     | 207        | 25        |                                                                                                                                                                                                                                   |
| <i>P. ankaliazontas</i> | Nad9         | incomplete        | incomplete        | Pervasive central and 3' editing, diminished at 5' end. | 265               | 467               | 76,22641509     | 218        | 16        | Cannot assemble full-length mRNA. Truncated at 5' end, without a good candidate start codon. Like Nad4, there is a GC-rich region, supported by reads, that looks like it should be edited, but isn't.                            |
| <i>P. ankaliazontas</i> | Cob          | complete          | complete          | pan                                                     | 642               | 1195              | 86,13707165     | 575        | 49        | 2 possible G deletions. Stop codon generated by U insertion.                                                                                                                                                                      |
| <i>P. ankaliazontas</i> | Cox1         | complete          | complete          | 5' and 3' editing                                       | 1392              | 1665              | 19,61206897     | 282        | 10        | U insertion generates start codon. U insertion generates stop codon.                                                                                                                                                              |
| <i>P. ankaliazontas</i> | Cox2         | complete          | complete          | pan                                                     | 340               | 651               | 91,47058824     | 322        | 11        | Stop codon generated by U insertion.                                                                                                                                                                                              |
| <i>P. ankaliazontas</i> | Cox3         | possibly complete | likely complete   | pan                                                     | 377               | 771               | 104,5092838     | 411        | 17        | Stop codon generated by U insertion. Possibly truncated at 5' end.                                                                                                                                                                |
| <i>P. ankaliazontas</i> | Atp6         | incomplete        | unknown           | pan                                                     | 349               | 693               | 98,56733524     | 383        | 39        |                                                                                                                                                                                                                                   |
| <i>P. ankaliazontas</i> | rps12        | likely complete   | complete          | pan                                                     | 162               | 315               | 94,44444444     | 166        | 13        | Stop codon generated by U insertion. No ATG start identified, but likely complete based on MSA.                                                                                                                                   |
| <i>P. ankaliazontas</i> | Murf1        | incomplete        | complete          | unknown (likely pan)                                    | 162               | 310               | 91,35802469     | 150        | 1         | Cannot resolve 3' end of transcript                                                                                                                                                                                               |
| <i>P. ankaliazontas</i> | putative 9S  | possibly complete | complete          | unedited                                                | 676               | 676               | 0               | 0          | 0         |                                                                                                                                                                                                                                   |
| <i>P. ankaliazontas</i> | putative 12S | possibly complete | complete          | minimal                                                 | 1050              | 1050              | 0               | 0          | 0         | C-to-U, A-to-I editing                                                                                                                                                                                                            |
| <i>A. spiralis</i>      | Nad1         | complete          | complete          | pan                                                     | 481               | 732               | 52,18295218     | 331        | 80        |                                                                                                                                                                                                                                   |
| <i>A. spiralis</i>      | Nad4         | incomplete        | complete          | 5' editing                                              | 1874              | 1899              | 1,334044824     | 42         | 17        | Possible pseudogene (N-terminal part of protein in transcript but broken in all contigs)                                                                                                                                          |
| <i>A. spiralis</i>      | Nad5         | possibly complete | complete          | 5' editing                                              | 1196              | 1347              | 12,62541806     | 198        | 47        |                                                                                                                                                                                                                                   |
| <i>A. spiralis</i>      | Nad7         | complete          | complete          | 5' and 3' editing                                       | 1128              | 1192              | 5,673758865     | 96         | 32        |                                                                                                                                                                                                                                   |



|                    |              |                   |                            |                   |      |      |             |     |    |                                                                     |
|--------------------|--------------|-------------------|----------------------------|-------------------|------|------|-------------|-----|----|---------------------------------------------------------------------|
| <i>A. spiralis</i> | Nad8         | complete          | complete                   | pan               | 278  | 462  | 66,18705036 | 236 | 52 |                                                                     |
| <i>A. spiralis</i> | Nad9         | incomplete        | complete                   | pan               | 322  | 525  | 63,04347826 | 248 | 45 | Termini incomplete in cDNA, in frame stop                           |
| <i>A. spiralis</i> | Cob          | incomplete        | complete                   | 5' and 3' editing | 1373 | 1479 | 7,720320466 | 148 | 42 | Likely more editing at 5' and 3' ends but not helped by transcripts |
| <i>A. spiralis</i> | Cox1         | possibly complete | complete (but two contigs) | 5' editing        | 1476 | 1476 | 0           | 19  | 19 |                                                                     |
| <i>A. spiralis</i> | Cox2         | complete          | complete                   | 5' and 3' editing | 519  | 594  | 14,45086705 | 128 | 51 |                                                                     |
| <i>A. spiralis</i> | Cox3         | complete          | complete                   | 5' and 3' editing | 762  | 795  | 4,330708661 | 79  | 46 |                                                                     |
| <i>A. spiralis</i> | Atp6         | possibly complete | complete                   | pan               | 206  | 357  | 73,30097087 | 190 | 39 |                                                                     |
| <i>A. spiralis</i> | putative 9S  | possibly complete | complete                   | unedited          | 334  | 334  | 0           | 0   | 0  |                                                                     |
| <i>A. spiralis</i> | putative 12S | possibly complete | complete                   | unedited          | 1108 | 1108 | 0           | 0   | 0  |                                                                     |
